# Supplementary material for: Restoration of Li + pathways in the [010] direction during direct regeneration for spent LiFePO 4
Source: Royal Society of Chemistry journal article supplement (doi:10.1039/d5ee00641d), 2025-01-01
Supplement: d5ee00641d1.pdf [file d5ee00641d1.pdf]

## Supplementary Information

### Restoration of Li<sup>+</sup> Pathways in the [010] Direction during Direct Regeneration for Spent LiFePO<sub>4</sub>

Shuaipeng Hao<sup>a</sup>, Yuelin Lv<sup>a</sup>, Yi Zhang<sup>a</sup>, Shuaiwei Liu<sup>b</sup>, Zhouliang Tan<sup>c</sup>, Wei Liu<sup>d,e</sup>,  
Yuanguang Xia<sup>d,e</sup>, Wen Yin<sup>d,e</sup>, Yaqi Liao<sup>a</sup>, Haijin Ji<sup>a</sup>, Yuelin Kong<sup>a</sup>, Yudi Shao<sup>a</sup>,  
Yunhui Huang<sup>a\*</sup>, Lixia Yuan<sup>a\*</sup>

<sup>a</sup> State Key Laboratory of Material Processing and Die & Mould Technology, School of Materials Science and Engineering, Huazhong University of Science and Technology, Wuhan, Hubei, 430074, China.

<sup>b</sup> Karlsruhe Institute of Technology (KIT), Institute for Applied Materials-Energy Storage Systems (IAM-ESS), Hermann-von-Helmholtz-Platz 1, D-76344 Eggenstein-Leopoldshafen, Karlsruhe, Germany.

<sup>c</sup> State Key Laboratory of Chemistry and Utilization of Carbon Based Energy Resources, College of Chemistry, Xinjiang University, Urumqi, 830017, Xinjiang, China

<sup>d</sup> Institute of High Energy Physics Chinese Academy of Sciences, Beijing, 100049, P. R. China.

<sup>e</sup> China Spallation Neutron Source Science Center, Dongguan, 523803, P. R. China.

E-mail: huangyh@hust.edu.cn; yuanlixia@hust.edu.cn

## Methods

### Battery Disassembly Separation

Spent  $\text{LiFePO}_4$  and  $\text{LiNi}_{0.5}\text{Co}_{0.2}\text{Mn}_{0.3}\text{O}_2$  pouch batteries were discharged by immersing them in 2 mol/L NaCl solution for 24 h. Then, the batteries were manually disassembled to separate the cathode electrode, anode electrode, aluminum-plastic film, and diaphragm. The stripped cathode electrode was cleaned with dimethyl carbonate (DMC).

### Separation of Al foil and spent LFP/NCM523 cathode using TA solution

The spent LFP and spent NCM523 cathodes were immersed in a 1 mol/L TA solution with a solid-liquid ratio of 30 g/L at 25 °C where the Al foils were separated from the spent LFP layer and the spent NCM523 layer. Afterward, the Al foil was then removed from the solution, washed three times with deionized water, and dried at 80 °C for 6 h to obtain the separated aluminum foil. The TA solution and separated S-LFP cathode were used directly in the hydrothermal regeneration process.

### Direct regeneration process

Firstly, the TA solution and separated spent LFP cathode from the separation step were transferred to the PTFE liner of a 50 mL autoclave. Then lithium hydroxide monohydrate ( $\text{LiOH}\cdot\text{H}_2\text{O}$ ) was added, and the mixture was stirred for 30 minutes and subsequently reacted in an oven at different temperatures and times. The reactants were centrifugally washed three times with deionized water and the powder was gathered and dried in an oven at 80 °C for 6 h. Lastly, it was mixed with 2%wt. of  $\text{Li}_2\text{CO}_3$  and annealed under argon atmosphere at different temperatures and times (heating rate 5 °C/min) to finally obtain the regenerated LFP.

Optimal conditions: The TA solution and separated spent LFP cathode (solid-liquid ratio of 30 g/L) from the separation step were transferred to the PTFE liner of a 50 mL autoclave. Then 2 mol/L  $\text{LiOH}\cdot\text{H}_2\text{O}$  was put in and heated at 120 °C for 5 h. After

cooling to room temperature and centrifugal washing, H-LFP was obtained by drying. H-LFP was then mixed with 2%wt.  $\text{Li}_2\text{CO}_3$  and annealed at 650 °C for 5 h to obtain R-LFP.

As comparison experiments, S2-LFP (30% degradation), S3-LFP (50% degradation) and S4-LFP (75% degradation) were regenerated according to the above regeneration process to obtain R2-LFP, R3-LFP and R4-LFP. Moreover, S-LFP was mixed with  $\text{Li}_2\text{CO}_3$  at a molar ratio of Li/Fe of 1.02 for 5 h at 400 rpm/min, calcined at 350 °C for 2 h and then at 650 °C for 10 h to obtain RS-LFP.

### **Material characterizations**

The XRD measurements were carried out on an Empyrean model instrument from Panacor in the Netherlands under the following conditions: radiation source Cu  $K\alpha$  ( $\lambda = 1.54184 \text{ \AA}$ ), and a measuring range of 10-80°. H-LFP and R-LFP using an Ag  $K\alpha$  ( $\lambda = 0.55941 \text{ \AA}$ ). The in-situ XRD measurements used CR2025 coin cells with a glass window (diameter=5 mm). The XRD data were characterized using and analyzed with HighScore Plus and GSAS II software. The elemental contents of the cathode materials and solutions were characterized by an inductively coupled plasma emission spectrometer (ICP-OES) from Leeman Labs, USA. The microstructure and morphology of the materials were analyzed by a Nova NanoSEM450 field emission scanning electron microscope (SEM) from FEI, USA and a Tecnai G2 20 transmission electron microscope (TEM) from FEI, Netherlands. The composition of the cathode material was characterized by a thermogravimetric thermal analyzer (TG) from NETZSCH Instruments Manufacturing GmbH, Germany. X-ray photoelectron spectroscopy (XPS) of AXIS-ULTRA DLD-600W from Shimadzu-Kratos, Japan was utilized to detect the variation of elements and valence states on the surface of the materials and combined with Avantage software for analysis. The variation of functional groups and bond lengths of materials was investigated by a LabRAM HR800 laser confocal Raman spectrometer (Raman) from Horiba JobinYvon and a Nicolet iS50R Fourier Transform Infrared Spectrometer (FT-IR) from Thermo Scientific, USA. The local structural

evolution of the material (atomic occupancy, bond lengths between atoms) was measured by the Multi-Physics Spectrometer (MPI) at the China Scattered Neutron Source (CNSNS) and combined with the GASA II software to analyze it.

### **Computational details**

We have employed the Vienna Ab Initio Package (VASP) to perform the density functional theory (DFT) calculations within the generalized gradient approximation (GGA) using the PBE formulation. We have chosen the projected augmented wave (PAW) potentials to describe the ionic cores and take valence electrons into account using a plane wave basis set with a kinetic energy cutoff of 500 eV. Partial occupancies of the Kohn-Sham orbitals were allowed using the Gaussian smearing method with a width of 0.05 eV. The electronic energy was considered self-consistent when the energy change was smaller than  $10^{-5}$  eV. A geometry optimization was considered convergent when the force change was smaller than 0.05 eV/Å. Grimme's DFT-D3 methodology was used to describe the dispersion interactions. During structural optimizations, the gamma point in the Brillouin zone was used for k-point sampling, and all atoms were allowed to relax. Finally, the nudged elastic band (NEB) method determined Li migration transition states for path steps. The NEB method discretizes the path between the reactant and product into a series of structural images.

### **Electrochemical tests**

Cathode electrode powder, polyvinylidene fluoride (5wt% dissolved in N-methyl-2-pyrrolidone), and carbon black were blended in a weight ratio of 8:1:1 and stirred for 10 h. The slurry was covered with carbon-coated Al foil and dried in an oven at 80 °C for 6 h. Cycling performance was performed on assembled 2032-coin cells and LiFePO<sub>4</sub>||Li pouch cells at 2.5-4.3 V (1 C=170 mA/g) using the Land and Neware battery test system. The electrolyte was 1.0 M LiPF<sub>6</sub> in EC: DEC=1:1 Vol% with 5.0% FEC. A Princeton electrochemical workstation measured cyclic voltammetry (CV) and electrochemical impedance spectroscopy (EIS). The Galvanostatic Intermittent

Titration Technique (GITT) was measured utilizing the Land Battery Test System with a pulse time of 10 min and a relaxation time of 40 min.

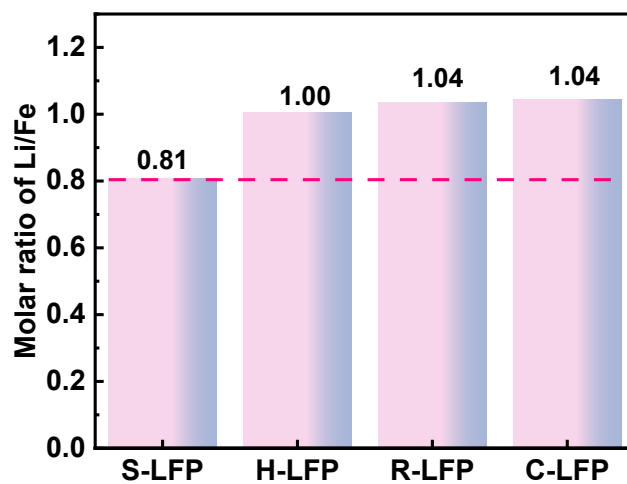

Fig. S1 Elemental analysis of S-LFP, H-LFP, R-LFP and C-LFP.

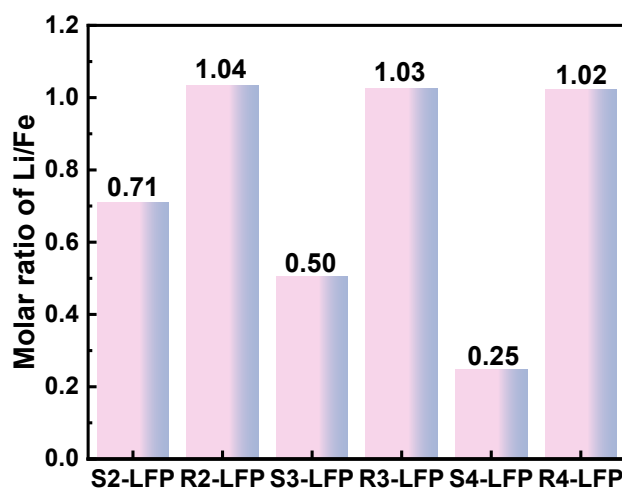

Fig. S2 Elemental analysis of S2-LFP, S3-LFP, S4-LFP, R2-LFP, R3-LFP and R4-LFP.

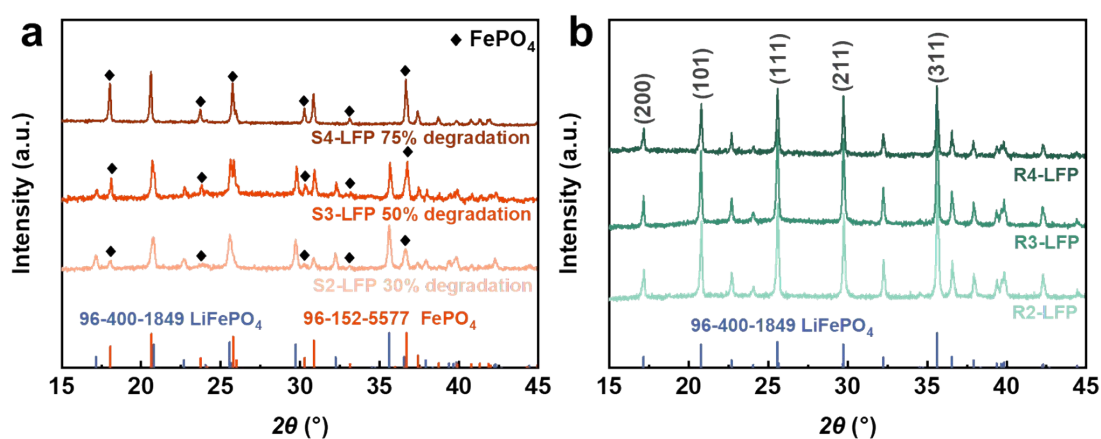

Fig. S3 XRD patterns of S2-LFP, S3-LFP, S4-LFP, R2-LFP, R3-LFP and R4-LFP.

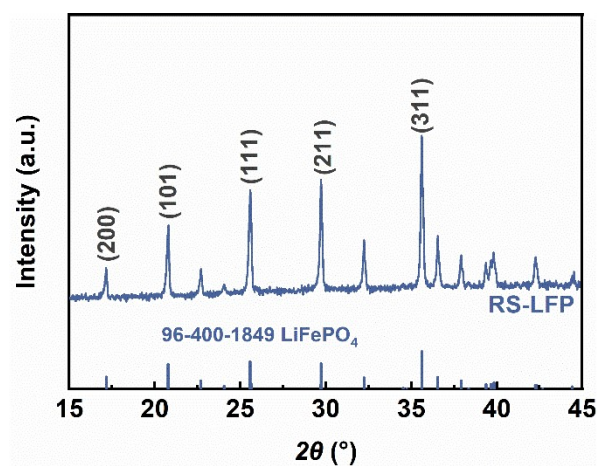

Fig. S4 XRD pattern of RS-LFP.

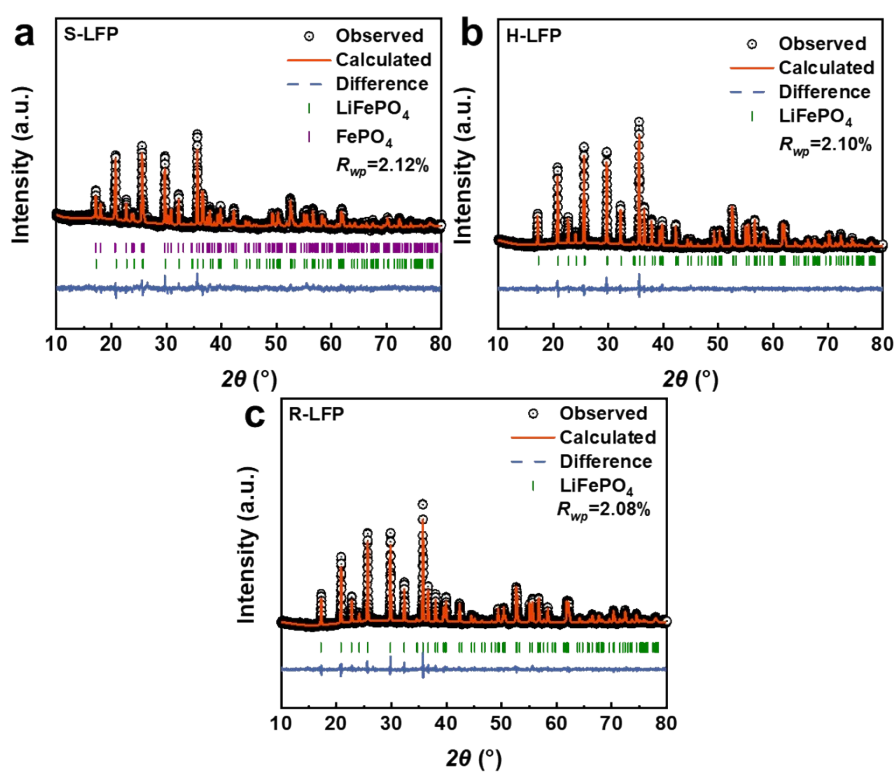

Fig. S5 Rietveld refinement of XRD patterns of S-LFP, H-LFP and R-LFP.

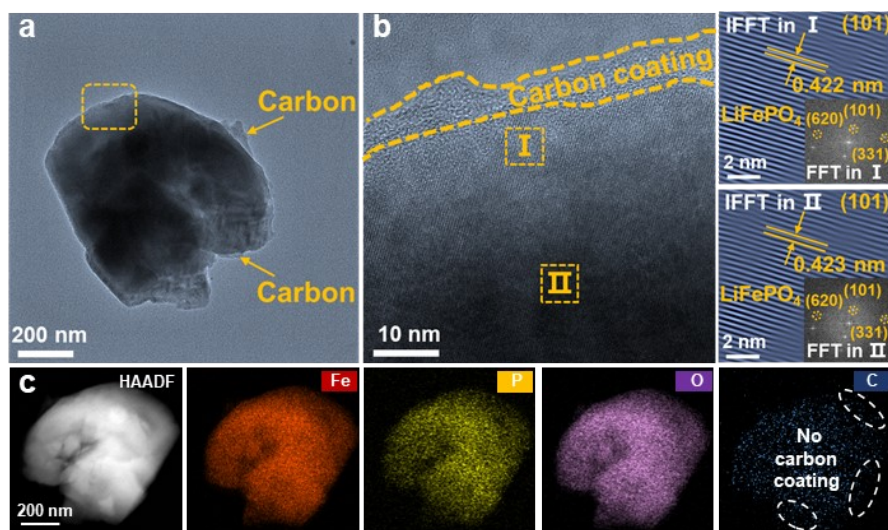

**Fig. S6** (a, b) HRTEM images and enlarged images of H-LFP (IFFT and FFT images within the I-II region). (c) HAADF-STEM and EDS images of H-LFP.

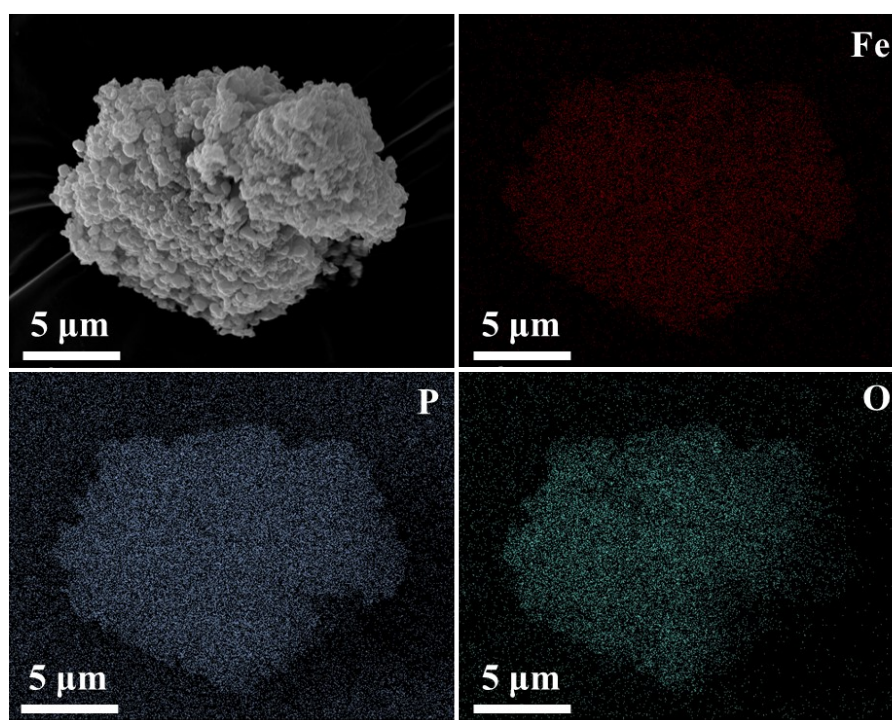

**Fig. S7** EDS image of S-LFP (Fe, P and O elements).



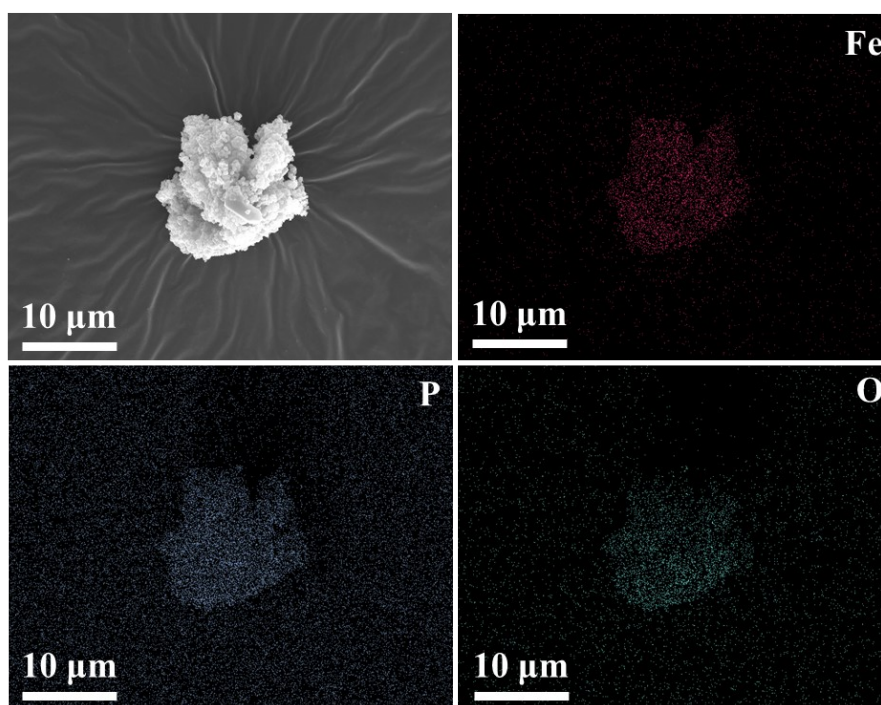

**Fig. S8** EDS image of R-LFP (Fe, P and O elements).

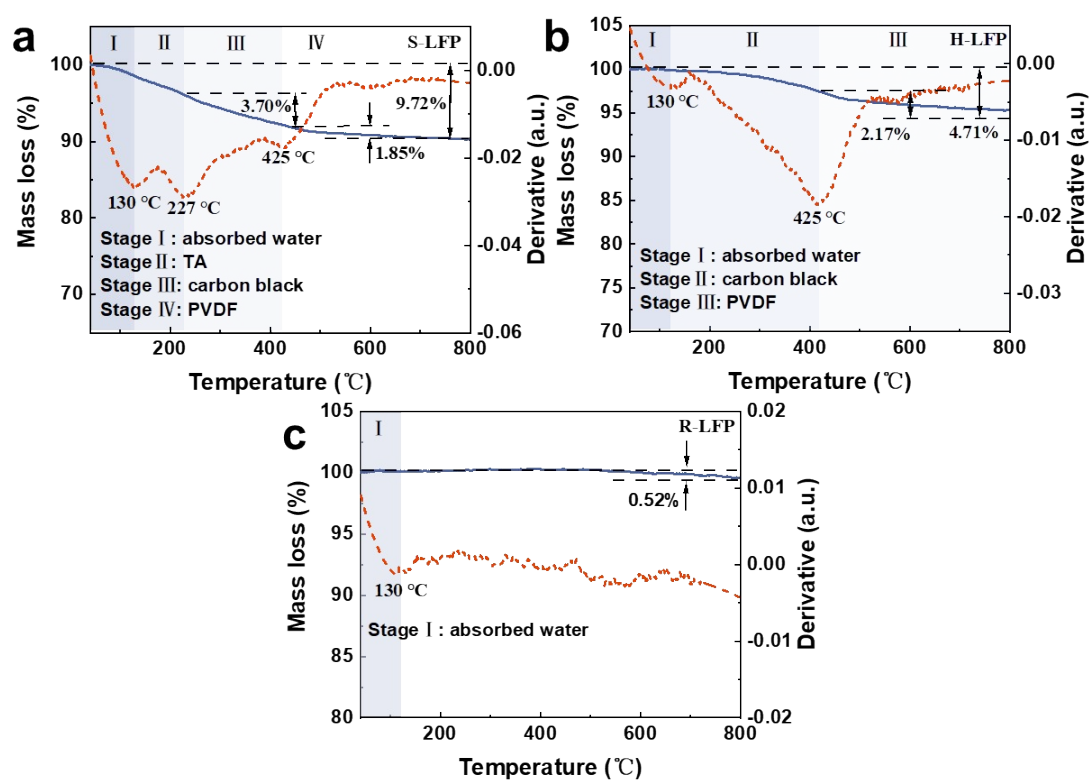

**Fig. S9** TG curves of S-LFP, H-LFP and R-LFP from 40 to 800 °C

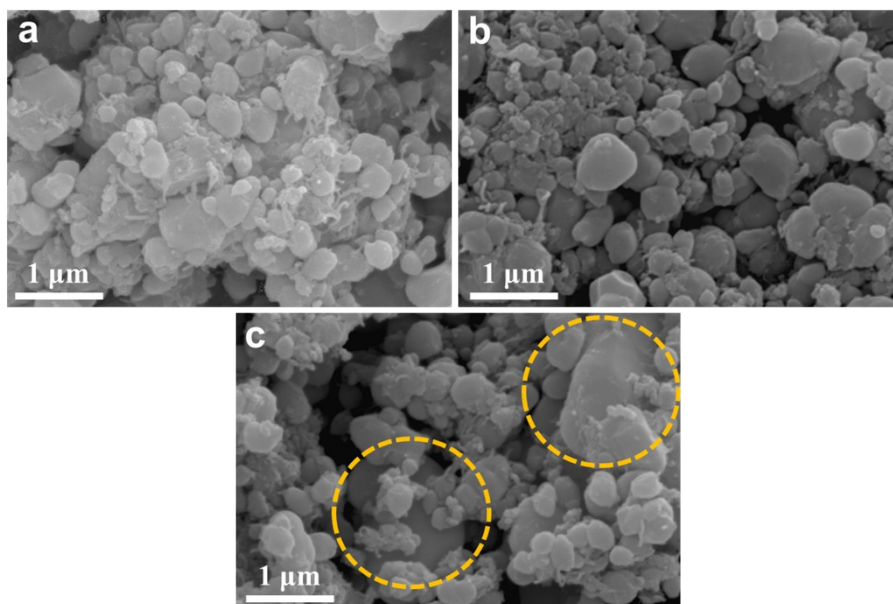

**Fig. S10** SEM images of S-LFP, H-LFP and R-LFP.

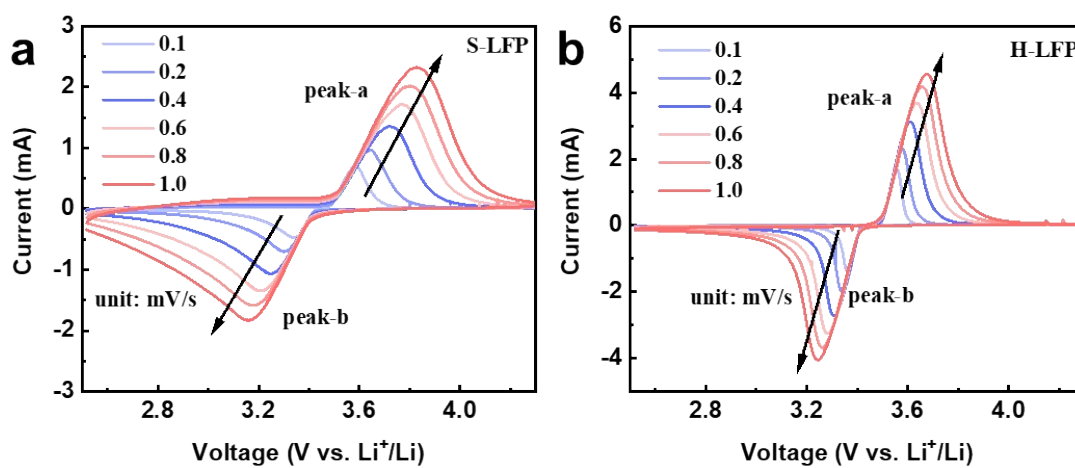

**Fig. S11** CV curves of S-LFP (a) and H-LFP (b) at different sweep speeds.

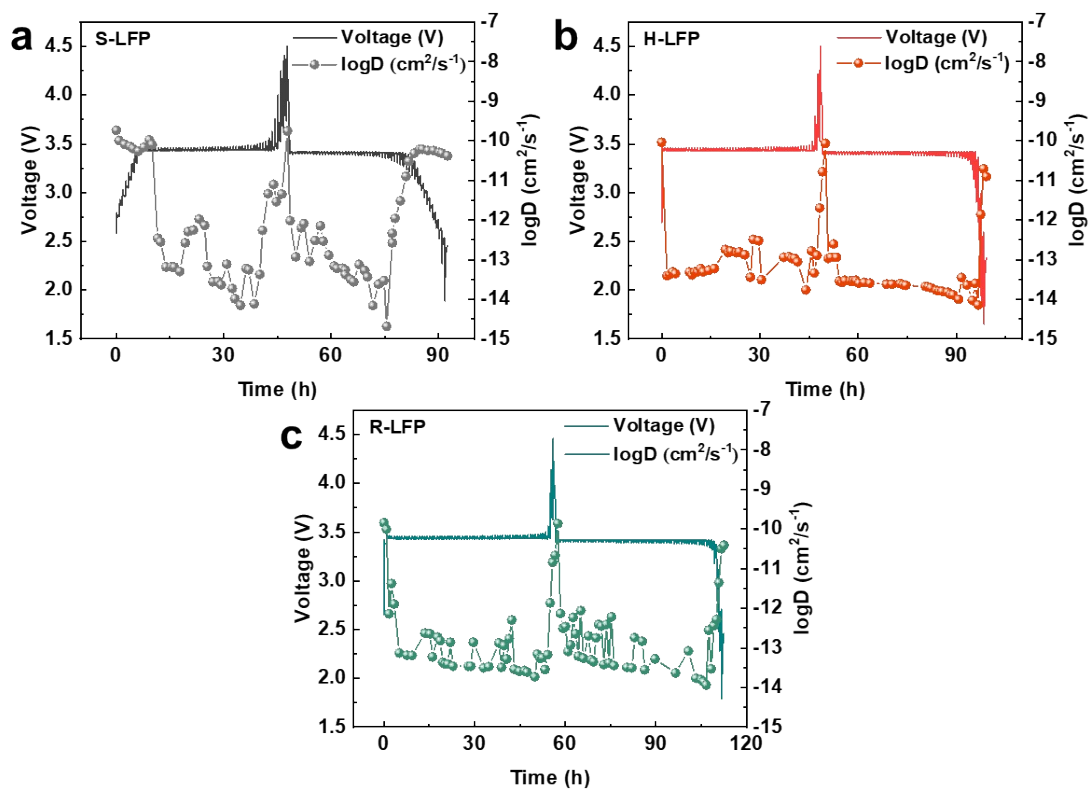

**Fig. S12** GITT profiles for the discharge/charge process and diffusion coefficients of S-LFP (a), H-LFP (b) and (c) R-LFP.

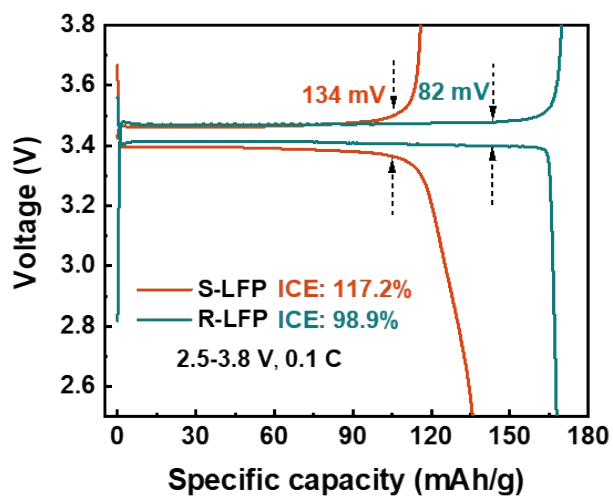

**Fig. S13** The initial charge and discharge curves of S-LFP and R-LFP at 0.1 C.

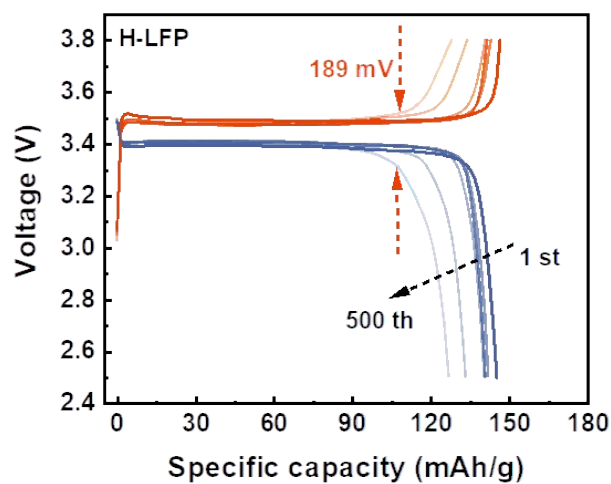

Fig. S14 Charge/discharge curves of H-LFP at various number of cycles.

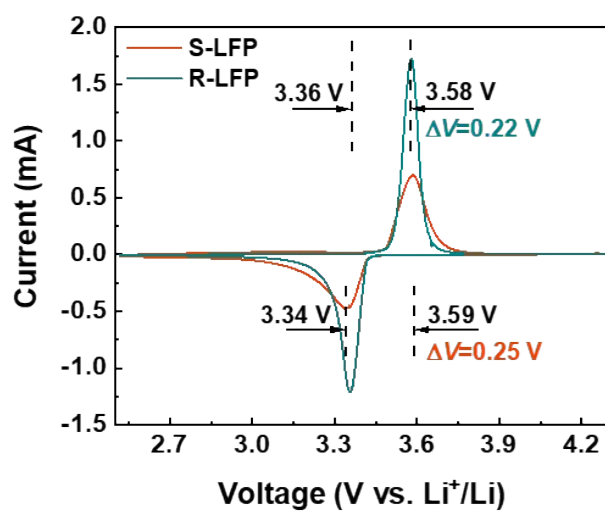

Fig. S15 CV curves at a scanning rate of 0.1 mV/s of S-LFP and R-LFP.

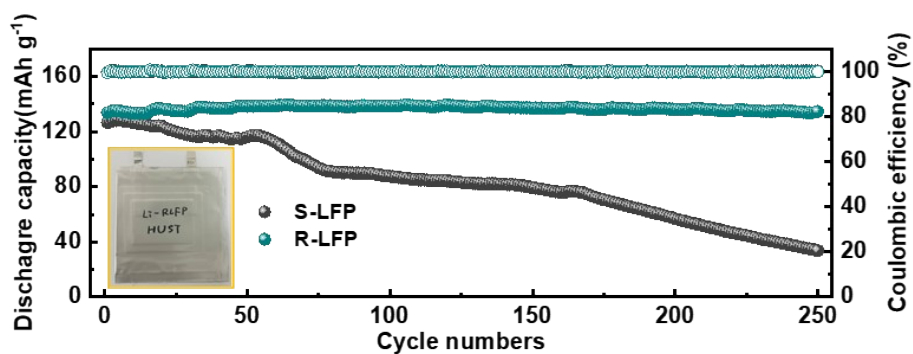

Fig. S16 Cycling performances of  $\text{LiFePO}_4||\text{Li}$  pouch cells of S-LFP and R-LFP.

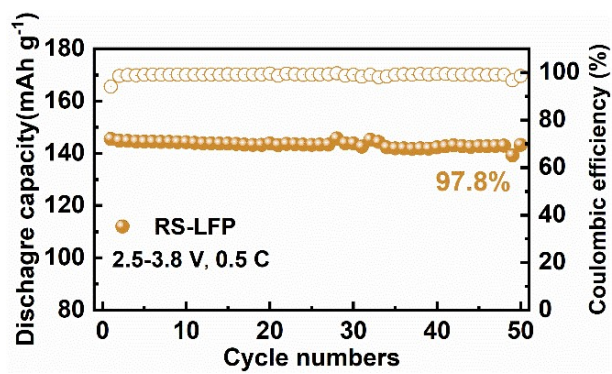

Fig. S17 Cycling performances of RS-LFP.

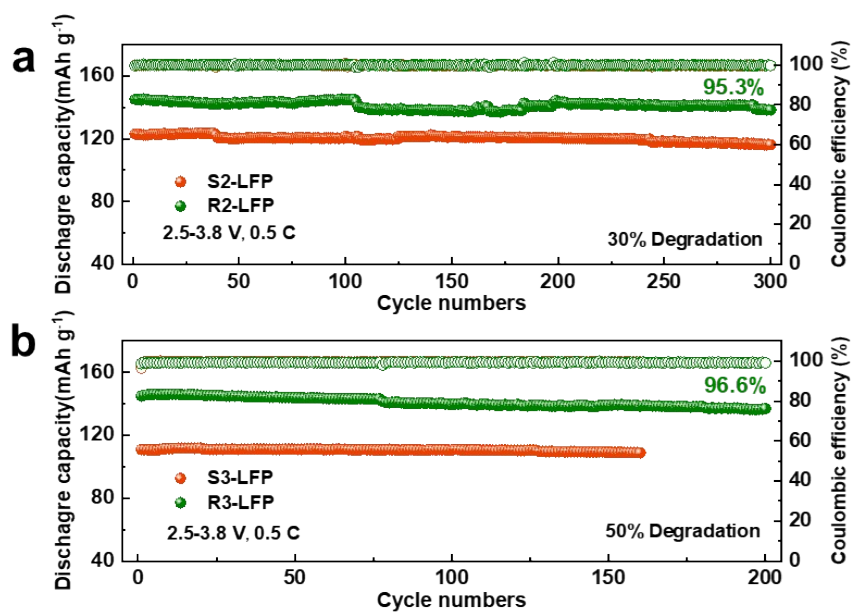

Fig. S18 Cycling performances of S2-LFP, R2-LFP, S3-LFP and R3-LFP with different degradation.

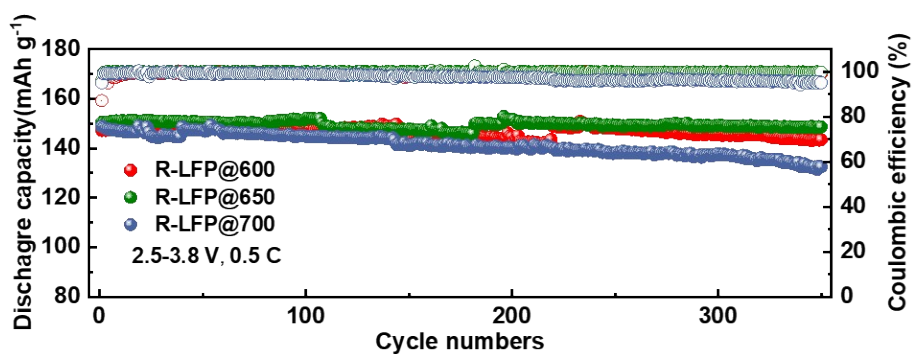

Fig. S19 Cycling performances of R-LFP obtained at different annealing temperatures.

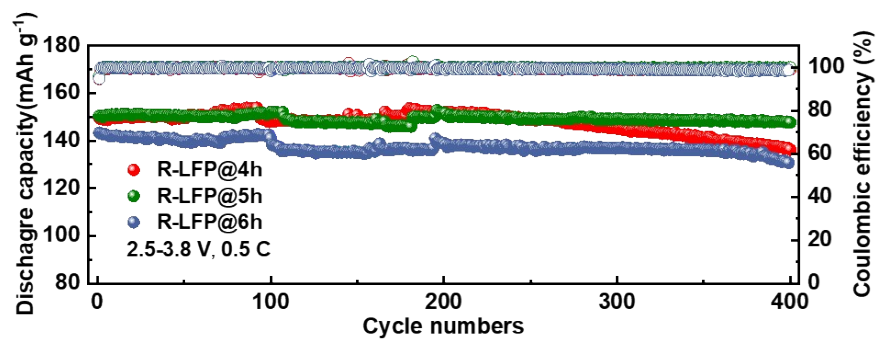

**Fig. S20** Cycling performances of R-LFP obtained at different annealing times.

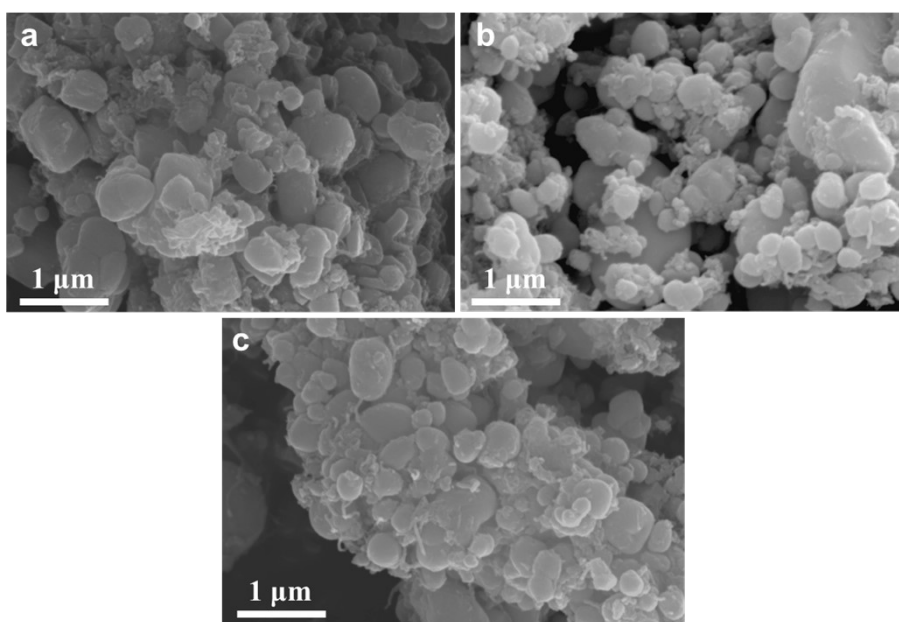

**Fig. S21** SEM images of R-LFP obtained at different annealing temperatures.

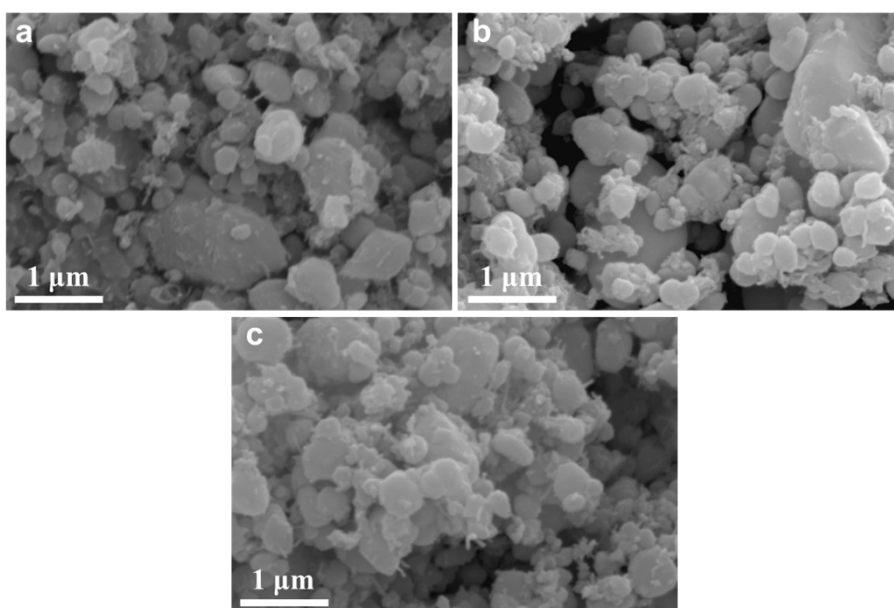

**Fig. S22** SEM images of R-LFP obtained at different annealing times.



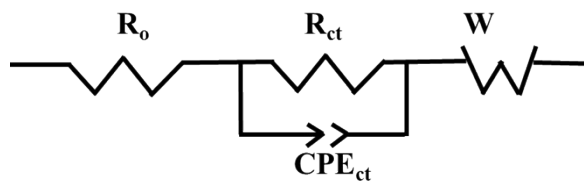

**Fig. S23** Equivalent circuit model used to fit experimental EIS data.

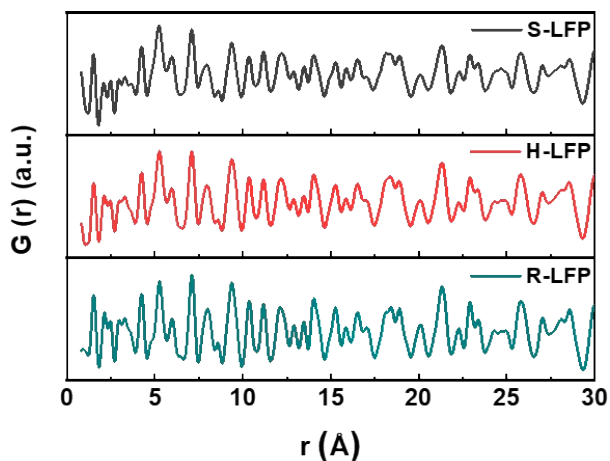

**Fig. S24** Neutron PDF data of S-LFP, H-LFP, and R-LFP with the data range from 0.8 to 30 Å.

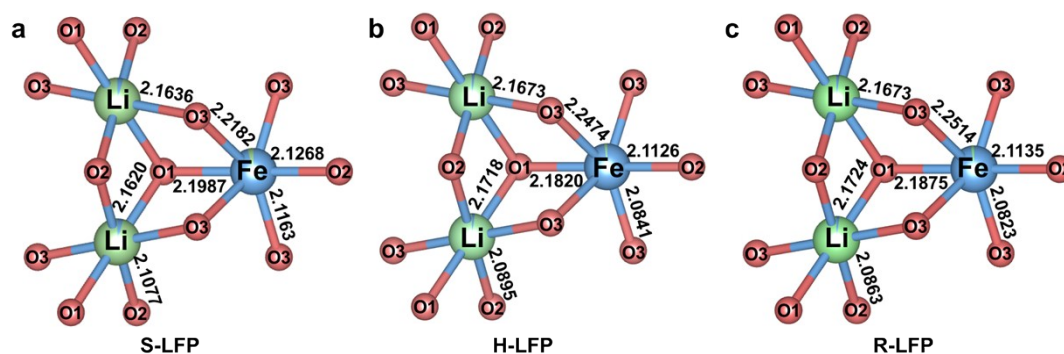

**Fig. S25** Bond lengths of S-LFP, H-LFP and R-LFP.

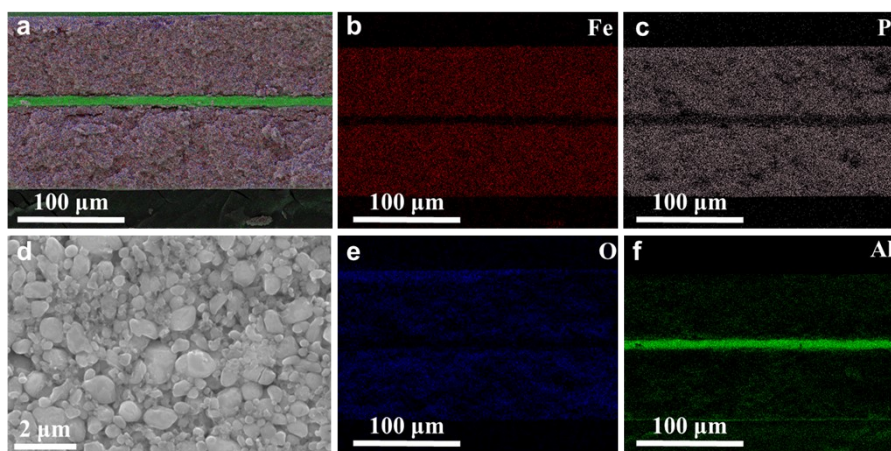

**Fig. S26** SEM and EDS images of S-LFP cathode (Fe, P, O and Al elements).

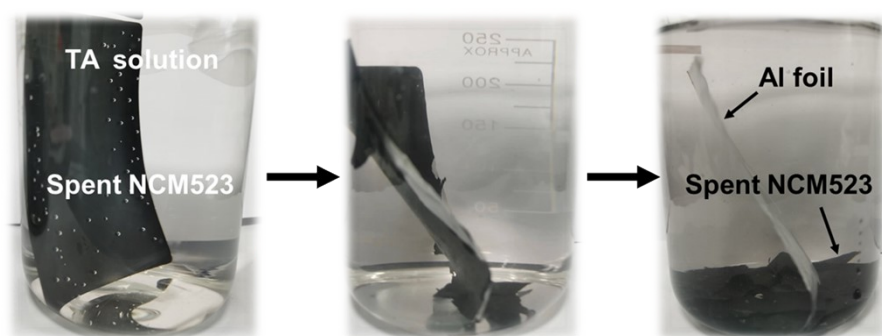

**Fig. S27** Separation process of Al foil with spent NCM523 cathode material

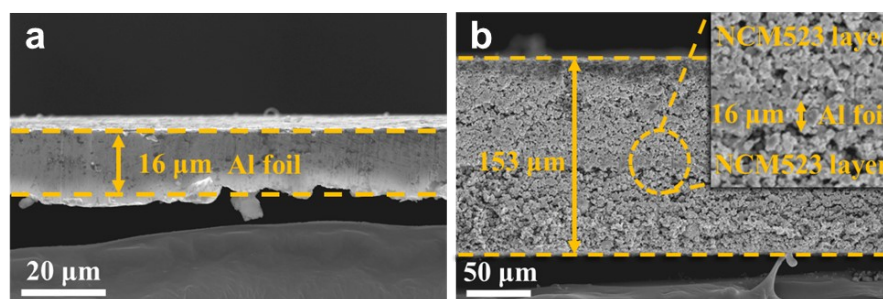

**Fig. S28** SEM images for (a) separated foil and (b) spent NCM523 cathode.

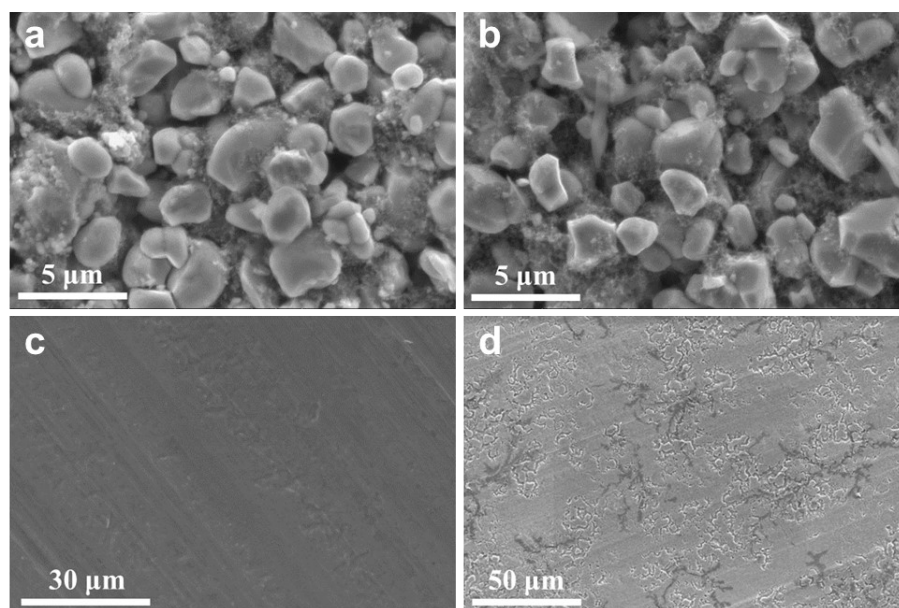

**Fig. S29** (a, b) SEM images of spent NCM523 before and after separation with TA solution. (c, d) SEM images of Al foil before and after separation with TA solution.



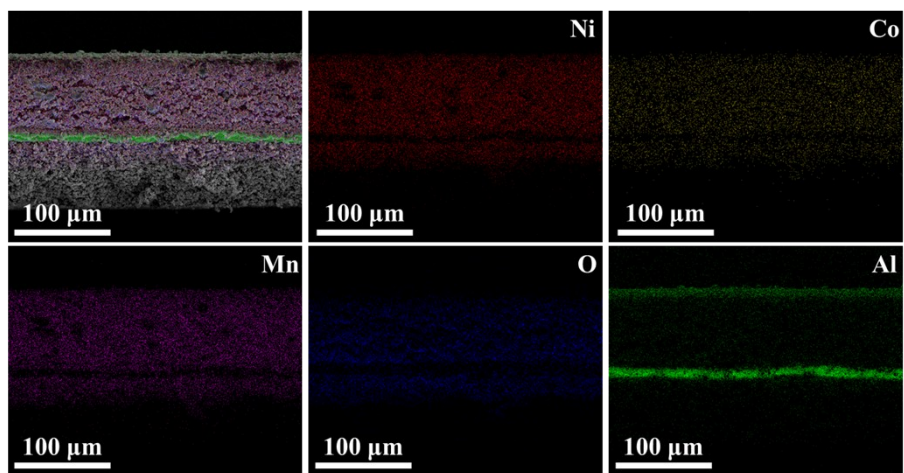

**Fig. S30** EDS image of spent NCM523 cathode (Ni, Co, Mn, O and Al elements).

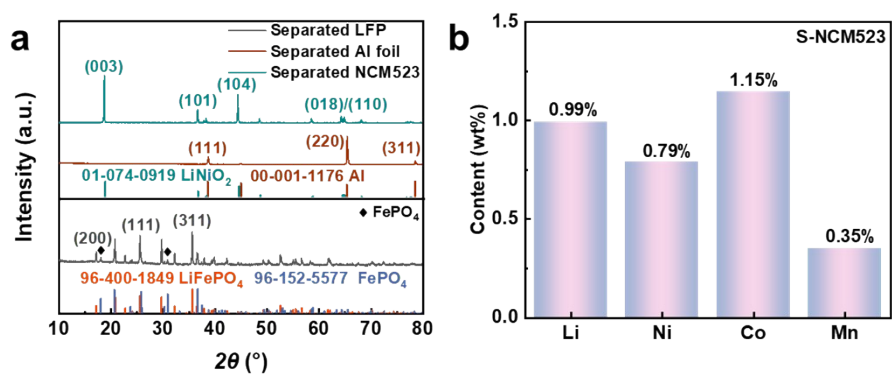

**Fig. S31** (a) XRD patterns of separated Al foil, spent NCM523 and spent LFP. (b) Content of Li, Ni, Co and Mn in TA solution after separation of spent NCM523.

**Table S1.** Elemental analysis of S-LFP under different hydrothermal conditions.

|        | Element contents (ppm) |            |           | Molar ratio of |
|--------|------------------------|------------|-----------|----------------|
|        | Li 670.783             | Fe 238.204 | P 214.914 | Li/Fe          |
| S-LFP  | 3.08                   | 30.67      | 17.15     | 0.8080         |
| 100-5h | 2.73                   | 24.73      | 13.81     | 0.8883         |
| 110-5h | 2.48                   | 20.57      | 11.42     | 0.9701         |
| 120-5h | 3.06                   | 24.46      | 13.64     | 1.0066         |
| 130-5h | 2.35                   | 19.17      | 10.64     | 0.9864         |
| 150-5h | 1.95                   | 16.48      | 9.15      | 0.9521         |
| 120-3h | 3.41                   | 31.18      | 17.35     | 0.8800         |
| 120-4h | 2.97                   | 25.23      | 13.89     | 0.9472         |
| 120-5h | 3.06                   | 24.46      | 13.64     | 1.0066         |
| 120-6h | 3.01                   | 24.37      | 13.52     | 0.9938         |
| 0.50   | 2.58                   | 24.31      | 13.89     | 0.8540         |
| 0.75   | 2.79                   | 24.17      | 13.45     | 0.9288         |
| 1.00   | 3.06                   | 24.46      | 13.64     | 1.0066         |
| 1.25   | 2.89                   | 23.39      | 12.85     | 0.9942         |

**Table S2.** Elemental analysis of S-LFP, H-LFP, R-LFP and C-LFP.

|       | Element contents (ppm) |            |           | Molar ratio of |
|-------|------------------------|------------|-----------|----------------|
|       | Li 670.783             | Fe 238.204 | P 214.914 | Li/Fe          |
| S-LFP | 3.08                   | 30.67      | 17.15     | 0.8080         |
| H-LFP | 3.06                   | 24.46      | 13.64     | 1.0066         |
| R-LFP | 3.26                   | 25.31      | 14.17     | 1.0364         |
| C-LFP | 4.35                   | 33.54      | 18.74     | 1.0436         |

**Table S3.** Elemental analysis of S2-LFP, S3-LFP, S4-LFP, R2-LFP, R3-LFP and R4-LFP.

|        | Element contents (ppm) |            |           | Molar ratio of |
|--------|------------------------|------------|-----------|----------------|
|        | Li 670.783             | Fe 238.204 | P 214.914 | Li/Fe          |
| S2-LFP | 2.43                   | 27.50      | 15.32     | 0.7110         |
| S3-LFP | 1.48                   | 23.62      | 13.07     | 0.5042         |
| S4-LFP | 0.46                   | 14.88      | 8.19      | 0.2487         |
| R2-LFP | 3.81                   | 29.63      | 16.24     | 1.0347         |
| R3-LFP | 3.42                   | 26.84      | 14.87     | 1.0253         |
| R4-LFP | 3.26                   | 25.62      | 14.26     | 1.0239         |

**Table S4.** Fitting result of an equivalent circuit model for impedance parameters at different states of S-LFP. (C-charge; D-discharge)

| <b>SOC/DOD</b> | <b><math>R_o</math> (<math>\Omega</math>)</b> | <b><math>R_{ct}</math> (<math>\Omega</math>)</b> |
|----------------|-----------------------------------------------|--------------------------------------------------|
| C-3.2          | 8.23                                          | 83.72                                            |
| C-3.3          | 7.5                                           | 76.47                                            |
| C-3.4          | 7.8                                           | 79.64                                            |
| C-3.5          | 5.88                                          | 70.63                                            |
| C-3.6          | 4.31                                          | 52.3                                             |
| C-4.0          | 4.703                                         | 51.08                                            |
| C-4.3          | 4.008                                         | 49.55                                            |
| D-4.0          | 4.704                                         | 42.21                                            |
| D-3.6          | 4.713                                         | 33.1                                             |
| D-3.5          | 4.766                                         | 34.17                                            |
| D-3.4          | 5.476                                         | 37.51                                            |
| D-3.3          | 5.383                                         | 44.77                                            |
| D-3.2          | 5.633                                         | 83.72                                            |

**Table S5.** Fitting result of an equivalent circuit model for impedance parameters at different states of H-LFP. (C-charge; D-discharge)

| <b>SOC/DOD</b> | <b><math>R_o</math> (<math>\Omega</math>)</b> | <b><math>R_{ct}</math> (<math>\Omega</math>)</b> |
|----------------|-----------------------------------------------|--------------------------------------------------|
| C-3.2          | 6.515                                         | 60.21                                            |
| C-3.3          | 6.443                                         | 59.35                                            |
| C-3.4          | 6.542                                         | 61.89                                            |
| C-3.5          | 6.519                                         | 58.73                                            |
| C-3.6          | 6.328                                         | 53.45                                            |
| C-4.0          | 6.175                                         | 49.51                                            |
| C-4.3          | 6.185                                         | 49.3                                             |
| D-4.0          | 3.567                                         | 21.89                                            |
| D-3.6          | 3.476                                         | 21.23                                            |
| D-3.5          | 3.644                                         | 23.99                                            |
| D-3.4          | 3.907                                         | 30.28                                            |
| D-3.3          | 3.622                                         | 26.74                                            |
| D-3.2          | 3.689                                         | 28.14                                            |

**Table 6.** Fitting result of an equivalent circuit model for impedance parameters at different states of R-LFP. (C-charge; D-discharge)

| <b>SOC/DOD</b> | <b><math>R_o</math> (<math>\Omega</math>)</b> | <b><math>R_{ct}</math> (<math>\Omega</math>)</b> |
|----------------|-----------------------------------------------|--------------------------------------------------|
| C-3.2          | 4.479                                         | 23.88                                            |
| C-3.3          | 4.488                                         | 24.06                                            |
| C-3.4          | 4.588                                         | 25.32                                            |
| C-3.5          | 4.583                                         | 25.59                                            |
| C-3.6          | 4.397                                         | 22.96                                            |
| C-4.0          | 4.431                                         | 20.09                                            |
| C-4.3          | 4.441                                         | 20.12                                            |
| D-4.0          | 4.207                                         | 9.137                                            |
| D-3.6          | 4.21                                          | 9.613                                            |
| D-3.5          | 4.427                                         | 11.47                                            |
| D-3.4          | 4.851                                         | 15.15                                            |
| D-3.3          | 4.544                                         | 13.32                                            |
| D-3.2          | 4.583                                         | 14.46                                            |

**Table S7.** Structural parameters obtained from Rietveld refinement of XRD diffraction pattern of S-LFP. Phase 1 LiFePO<sub>4</sub>: Space group: Pnma,  $R_{wp} = 2.12\%$ ,  $a = 10.31611 \text{ \AA}$ ,  $b = 6.001 \text{ \AA}$ ,  $c = 4.6895 \text{ \AA}$ ,  $\alpha = \beta = \gamma = 90^\circ$ . Fraction: 81.8%. Phase 2 FePO<sub>4</sub>: Space group: Pnma,  $a = 9.8094 \text{ \AA}$ ,  $b = 5.7862 \text{ \AA}$ ,  $c = 4.7799 \text{ \AA}$ ,  $\alpha = \beta = \gamma = 90^\circ$ , Fraction: 18.2%

| <b>LiFePO<sub>4</sub> (81.8%)</b> |             |                          |         |         |                  |
|-----------------------------------|-------------|--------------------------|---------|---------|------------------|
| <b>Atoms</b>                      | <b>Site</b> | <b>Wyckoff positions</b> |         |         | <b>Occupancy</b> |
| Fe1                               | 4c          | 0.28300                  | 0.25    | 0.97376 | 0.966            |
| Fe2                               | 4a          | 0                        | 0       | 0       | 0.034            |
| Li1                               | 4a          | 0                        | 0       | 0       | 0.966            |
| Li2                               | 4c          | 0.28300                  | 0.25    | 0.97376 | 0.034            |
| P1                                | 4c          | 0.09697                  | 0.25    | 0.42041 | 1                |
| O1                                | 4c          | 0.09314                  | 0.25    | 0.74072 | 1                |
| O2                                | 4c          | 0.45749                  | 0.25    | 0.19651 | 1                |
| O3                                | 8d          | 0.16440                  | 0.04698 | 0.28142 | 1                |

| <b>FePO<sub>4</sub> (18.2%)</b> |             |                          |         |         |                  |
|---------------------------------|-------------|--------------------------|---------|---------|------------------|
| <b>Atoms</b>                    | <b>Site</b> | <b>Wyckoff positions</b> |         |         | <b>Occupancy</b> |
| Fe1                             | 4c          | 0.27598                  | 0.25    | 0.95906 | 0.986            |
| P1                              | 4c          | 0.09560                  | 0.25    | 0.39755 | 1                |
| O1                              | 4c          | 0.13418                  | 0.25    | 0.74837 | 1                |
| O2                              | 4c          | 0.46834                  | 0.25    | 0.12921 | 1                |
| O3                              | 8d          | 0.17642                  | 0.02646 | 0.24853 | 1                |

**Table S8.** Structural parameters obtained from Rietveld refinement of XRD diffraction pattern of H-LFP. LiFePO<sub>4</sub>: Space group: Pnma,  $R_{wp} = 2.10\%$ ,  $a = 10.32133 \text{ \AA}$ ,  $b = 6.00284 \text{ \AA}$ ,  $c = 4.68877 \text{ \AA}$ ,  $\alpha = \beta = \gamma = 90^\circ$ .

| <b>Atoms</b> | <b>Site</b> | <b>Wyckoff positions</b> |          |         | <b>Occupancy</b> |
|--------------|-------------|--------------------------|----------|---------|------------------|
| Fe1          | 4c          | 0.28203                  | 0.25     | 0.97425 | 0.98             |
| Fe2          | 4a          | 0                        | 0        | 0       | 0.02             |
| Li1          | 4a          | 0                        | 0        | 0       | 0.98             |
| Li2          | 4c          | 0.28203                  | 0.25     | 0.97425 | 0.02             |
| P1           | 4c          | 0.09495                  | 0.25     | 0.42083 | 1                |
| O1           | 4c          | 0.09481                  | 0.25     | 0.74867 | 1                |
| O2           | 4c          | 0.45417                  | 0.25     | 0.20945 | 1                |
| O3           | 8d          | 0.16292                  | 0.042083 | 0.28389 | 1                |

**Table S9.** Structural parameters obtained from Rietveld refinement of XRD diffraction pattern of R-LFP. LiFePO<sub>4</sub>: Space group: Pnma,  $R_{wp} = 2.08\%$ ,  $a = 10.32554 \text{ \AA}$ ,  $b = 6.00472 \text{ \AA}$ ,  $c = 4.69001 \text{ \AA}$ ,  $\alpha = \beta = \gamma = 90^\circ$ .

| Atoms | Site | Wyckoff positions |         |         | Occupancy |
|-------|------|-------------------|---------|---------|-----------|
| Fe1   | 4c   | 0.28217           | 0.25    | 0.9734  | 0.982     |
| Fe2   | 4a   | 0                 | 0       | 0       | 0.018     |
| Li1   | 4a   | 0                 | 0       | 0       | 0.982     |
| Li2   | 4c   | 0.28217           | 0.25    | 0.9734  | 0.018     |
| P1    | 4c   | 0.09472           | 0.25    | 0.42372 | 1         |
| O1    | 4c   | 0.09548           | 0.25    | 0.7529  | 1         |
| O2    | 4c   | 0.45313           | 0.25    | 0.21807 | 1         |
| O3    | 8d   | 0.16352           | 0.04802 | 0.28312 | 1         |

**Table S10.** Structural parameters obtained from Rietveld refinement of the neutron diffraction pattern of S-LFP. Phase 1 LiFePO<sub>4</sub>: Space group: Pnma,  $R_{wp} = 2.62\%$ ,  $a = 10.3428 \text{ \AA}$ ,  $b = 6.0164 \text{ \AA}$ ,  $c = 4.7022 \text{ \AA}$ ,  $\alpha = \beta = \gamma = 90^\circ$ . Fraction: 82.9% . Phase 2 FePO<sub>4</sub>: Space group: Pnma,  $a = 9.8390 \text{ \AA}$ ,  $b = 5.7998 \text{ \AA}$ ,  $c = 4.7954 \text{ \AA}$ ,  $\alpha = \beta = \gamma = 90^\circ$ , Fraction: 17.1%

| LiFePO <sub>4</sub> (82.9%) |      |                   |         |         |           |
|-----------------------------|------|-------------------|---------|---------|-----------|
| Atoms                       | Site | Wyckoff positions |         |         | Occupancy |
| Fe1                         | 4c   | 0.28235           | 0.25    | 0.97014 | 0.968     |
| Fe2                         | 4a   | 0                 | 0       | 0       | 0.032     |
| Li1                         | 4a   | 0                 | 0       | 0       | 0.968     |
| Li2                         | 4c   | 0.28235           | 0.25    | 0.97014 | 0.032     |
| P1                          | 4c   | 0.09495           | 0.25    | 0.41411 | 1         |
| O1                          | 4c   | 0.09585           | 0.25    | 0.74575 | 1         |
| O2                          | 4c   | 0.45980           | 0.25    | 0.19869 | 1         |
| O3                          | 8d   | 0.16494           | 0.05357 | 0.27458 | 1         |

  

| FePO <sub>4</sub> (17.1%) |      |                   |         |         |           |
|---------------------------|------|-------------------|---------|---------|-----------|
| Atoms                     | Site | Wyckoff positions |         |         | Occupancy |
| Fe1                       | 4c   | 0.26684           | 0.25    | 0.96559 | 0.968     |
| P1                        | 4c   | 0.09045           | 0.25    | 0.43416 | 1         |
| O1                        | 4c   | 0.11666           | 0.25    | 0.77404 | 1         |
| O2                        | 4c   | 0.44956           | 0.25    | 0.13784 | 1         |
| O3                        | 8d   | 0.16978           | 0.07897 | 0.27367 | 1         |

**Table S11.** Structural parameters obtained from Rietveld refinement of neutron diffraction pattern of H-LFP.  $\text{LiFePO}_4$ : Space group: Pnma,  $R_{\text{wp}} = 2.56\%$ ,  $a = 10.3187 \text{ \AA}$ ,  $b = 6.0022 \text{ \AA}$ ,  $c = 4.6928 \text{ \AA}$ ,  $\alpha = \beta = \gamma = 90^\circ$ .

| Atoms | Site | Wyckoff positions |         |         | Occupancy |
|-------|------|-------------------|---------|---------|-----------|
| Fe1   | 4c   | 0.28233           | 0.25    | 0.97314 | 0.979     |
| Fe2   | 4a   | 0                 | 0       | 0       | 0.021     |
| Li1   | 4a   | 0                 | 0       | 0       | 0.979     |
| Li2   | 4c   | 0.28233           | 0.25    | 0.97314 | 0.021     |
| P1    | 4c   | 0.09385           | 0.25    | 0.41601 | 1         |
| O1    | 4c   | 0.09821           | 0.25    | 0.74447 | 1         |
| O2    | 4c   | 0.45803           | 0.25    | 0.20422 | 1         |
| O3    | 8d   | 0.16373           | 0.04948 | 0.28227 | 1         |

**Table S12.** Structural parameters obtained from Rietveld refinement of neutron diffraction pattern of R-LFP.  $\text{LiFePO}_4$ : Space group: Pnma,  $R_{\text{wp}} = 4.96\%$ ,  $a = 10.3288 \text{ \AA}$ ,  $b = 6.0059 \text{ \AA}$ ,  $c = 4.69043 \text{ \AA}$ ,  $\alpha = \beta = \gamma = 90^\circ$ .

| Atoms | Site | Wyckoff positions |        |        | Occupancy |
|-------|------|-------------------|--------|--------|-----------|
| Fe1   | 4c   | 0.28246           | 0.25   | 0.9745 | 0.985     |
| Fe2   | 4a   | 0                 | 0      | 0      | 0.015     |
| Li1   | 4a   | 0                 | 0      | 0      | 0.985     |
| Li2   | 4c   | 0.2824            | 0.25   | 0.9745 | 0.015     |
| P1    | 4c   | 0.0935            | 0.25   | 0.4147 | 1         |
| O1    | 4c   | 0.0982            | 0.25   | 0.7447 | 1         |
| O2    | 4c   | 0.4581            | 0.25   | 0.2054 | 1         |
| O3    | 8d   | 0.1634            | 0.0486 | 0.283  | 1         |
